# Supplementary material
Source: PubMed Central journal article supplement (PMC2895334)
Supplement: mmc1.pdf [file mmc1.pdf]

Biophysical Journal, Volume 98

**Supporting Material**

**Long Timescale Molecular Dynamics Simulations of the Major Urinary Protein Provide Atomistic Interpretations for the Unusual Thermodynamics of Ligand Binding**

Julie Roy and Charles A. Laughton

**Supplementary material for:**

**Long Timescale Molecular Dynamics Simulations of the Major Urinary Protein Provide Atomistic Interpretations for the Unusual Thermodynamics of Ligand Binding**

*Julie Roy and Charles A Laughton\**

**School of Pharmacy and Centre for Biomolecular Sciences, University of Nottingham,  
University Park, Nottingham NG7 2RD, UK.**

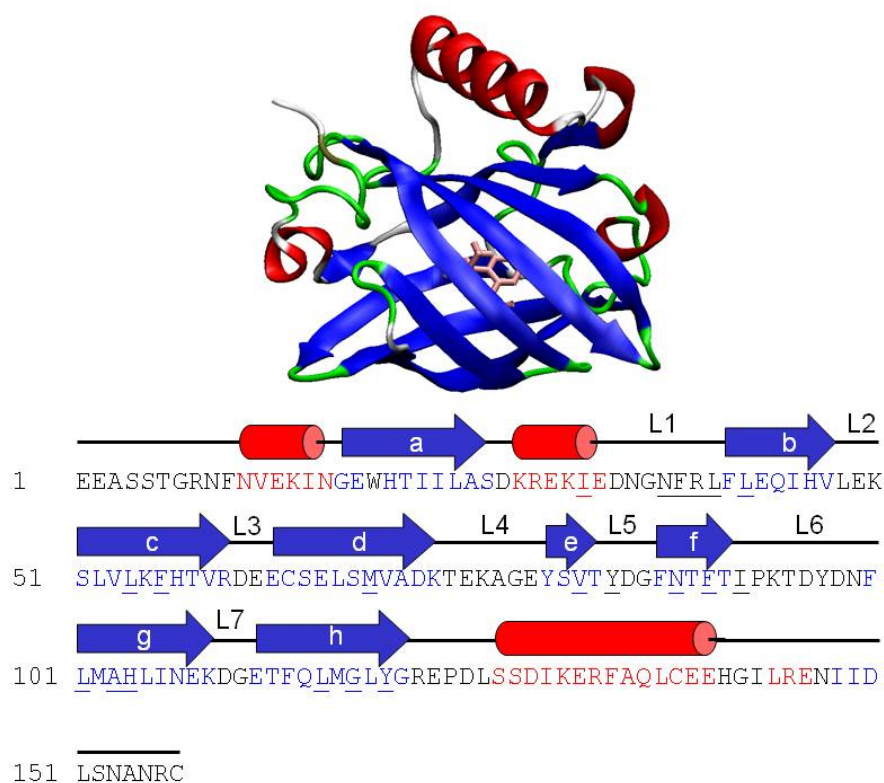

Figure S1. Sequence and structure of MUP. Underlined residues contact the bound IBM ligand (pink)

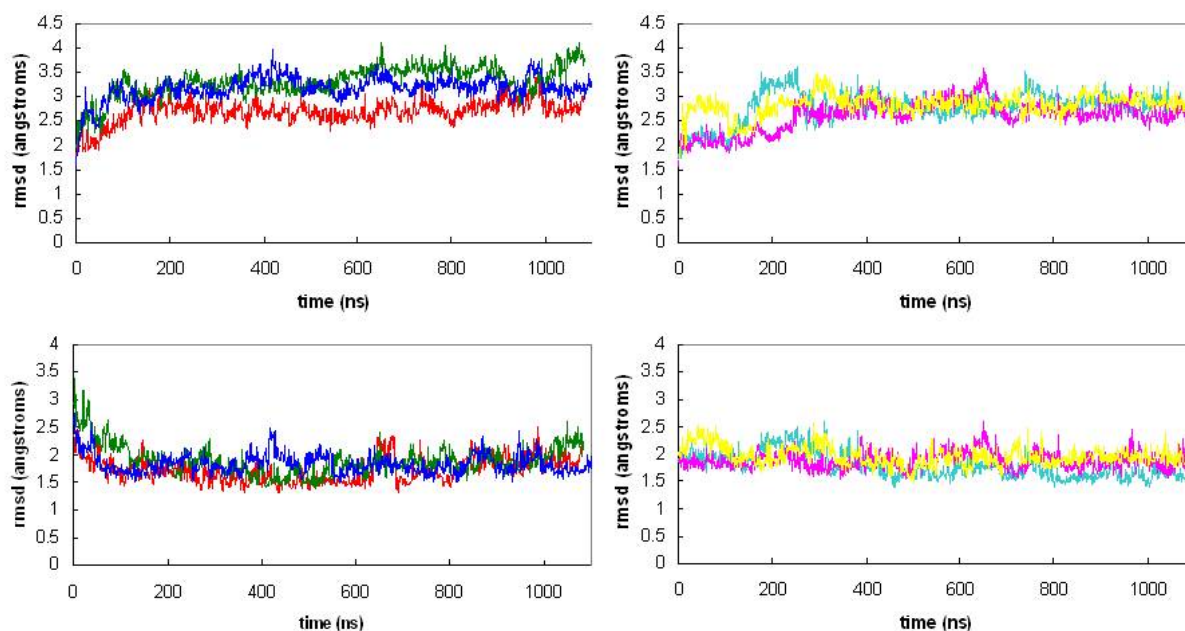

Figure S2. RMSD profiles for the first 1.1 microseconds of each simulation. Apo1: red; apo2: blue; apo3: green; ibm1: cyan; ibms2: magenta; ibm3: yellow. Top: RMSD from the respective crystals structures, below: RMSDs from the time-averaged structures

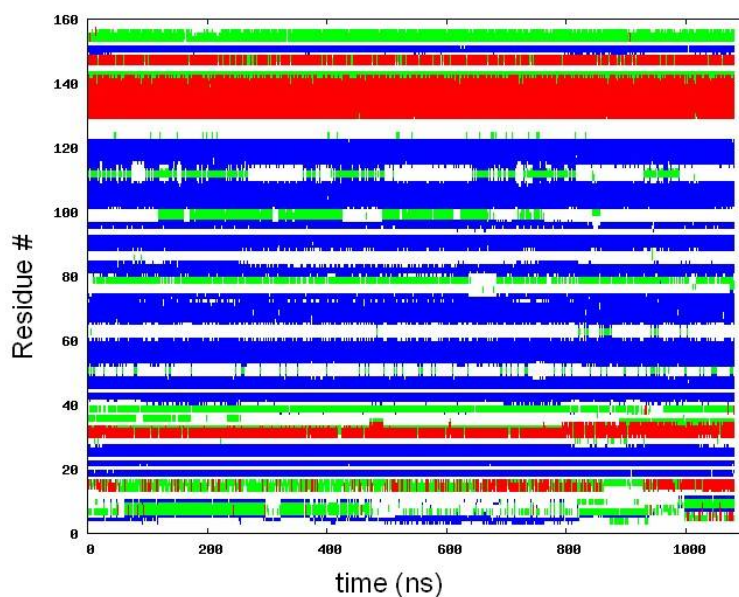

Figure S3. Secondary structure conservation over the first 1.1 microseconds of simulation apo1. Colour coding of secondary structure is as in Figure 1 in the main paper: red: alpha helix; blue: beta strand; green: turn.

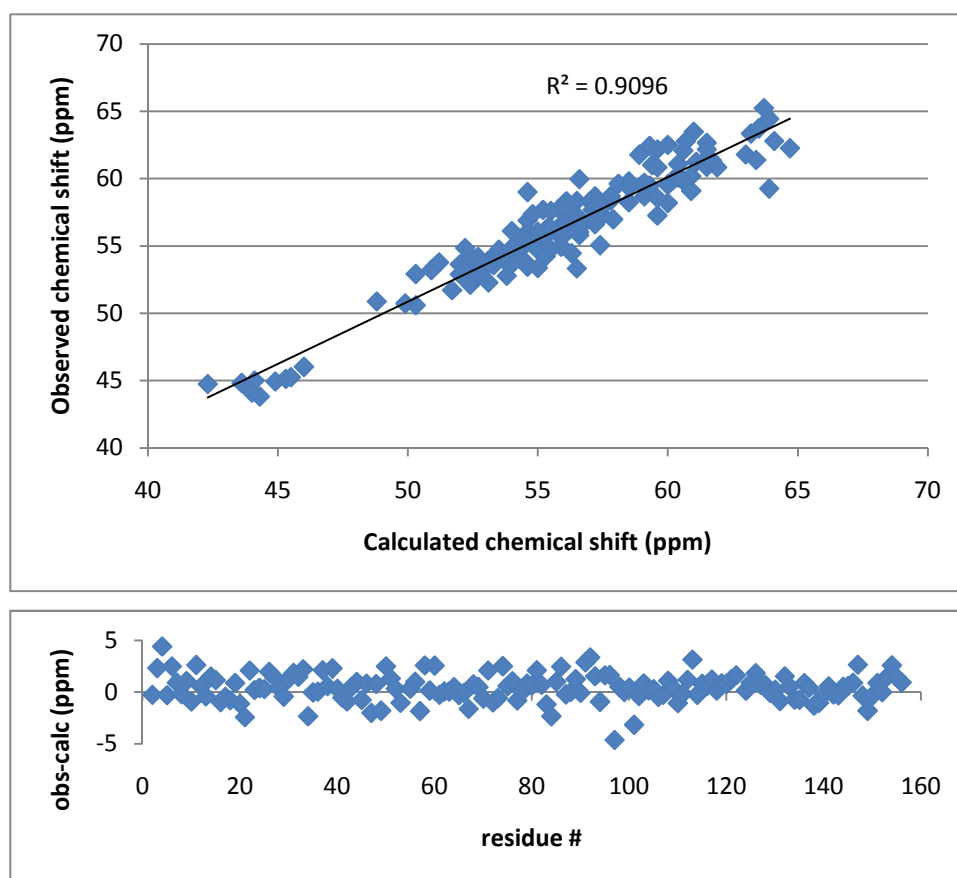

Figure S4. Top: Correlation between predicted Calpha chemical shifts (average calculated from 20 snapshots taken from simulation apo1 using CamShift) and values reported in BMRB entry 1470. Bottom: Errors between calculated and observed values.

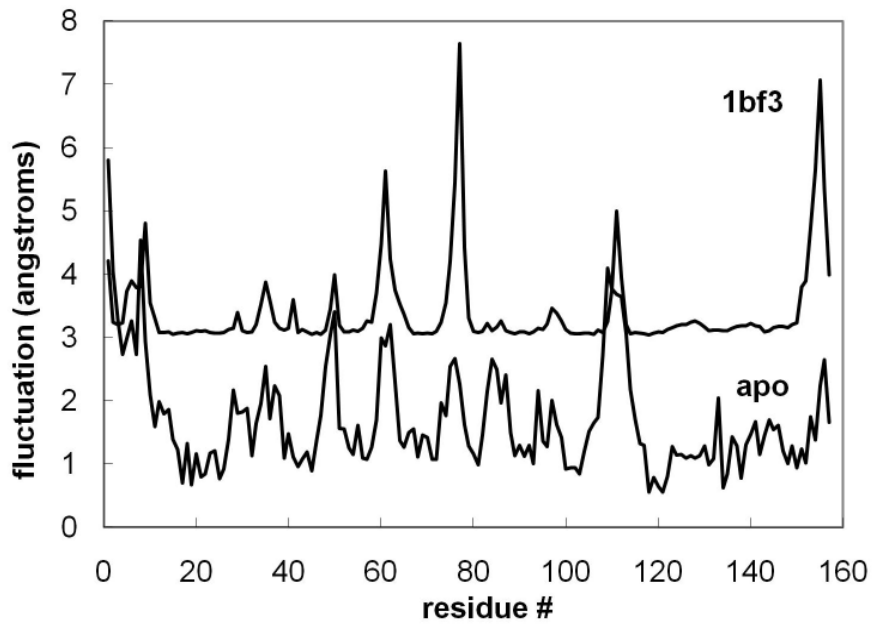

Figure S5. Comparison of the average of the RMS fluctuation profiles for the three apo simulations with that calculated from the ten structures for apo MUP in PDB entry 1BF3. The NMR data has been displaced vertically by 3 angstroms.

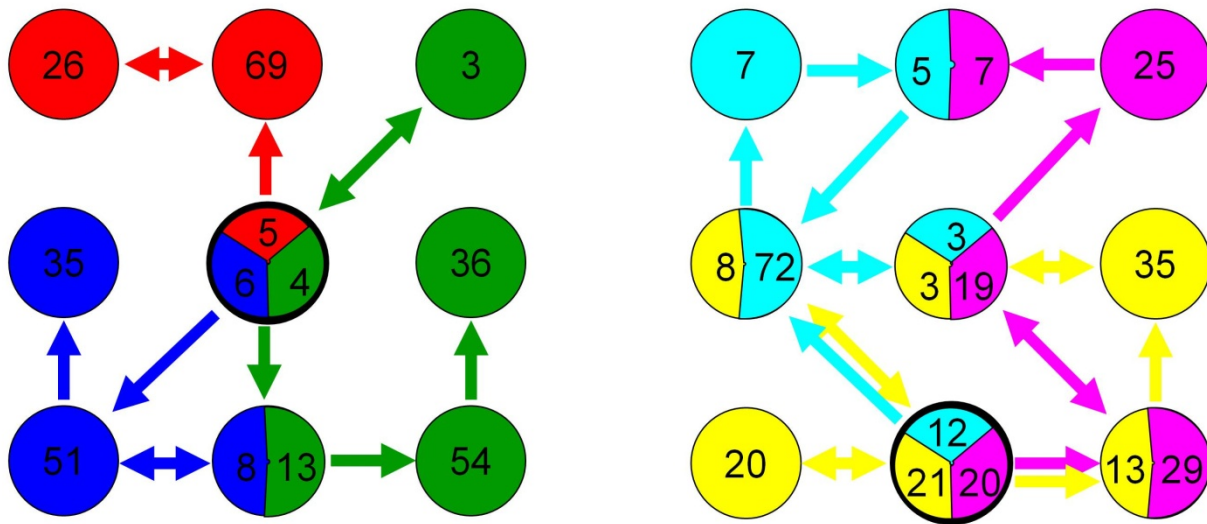

Figure S6. Cluster analysis of apo- (left) and ibm- (right) simulations. The clusters containing the crystal structures are outlined in black. Numbers in circles give the percentage occupancy of each cluster, arrows indicate cluster transitions. Colour coding is: apo1: red; apo2: blue; apo3: green; ibm1: cyan; ibm2: magenta; ibm3: yellow.

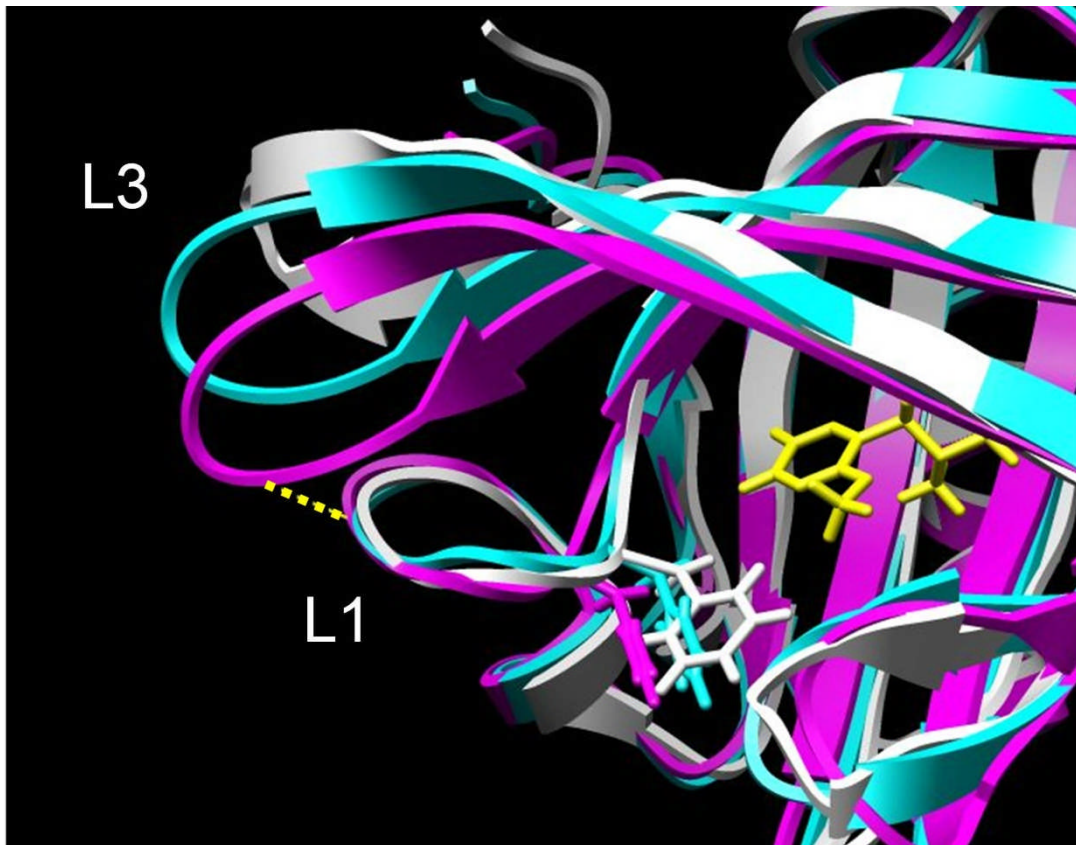

Figure S7. Comparison of the L3 regions of the apo- crystal structure (white), time-averaged structure from the three apo- simulations (magenta), and time-averaged structure from the three ibm- simulations (cyan). Phe38 and the ibm ligand (yellow) are also shown.

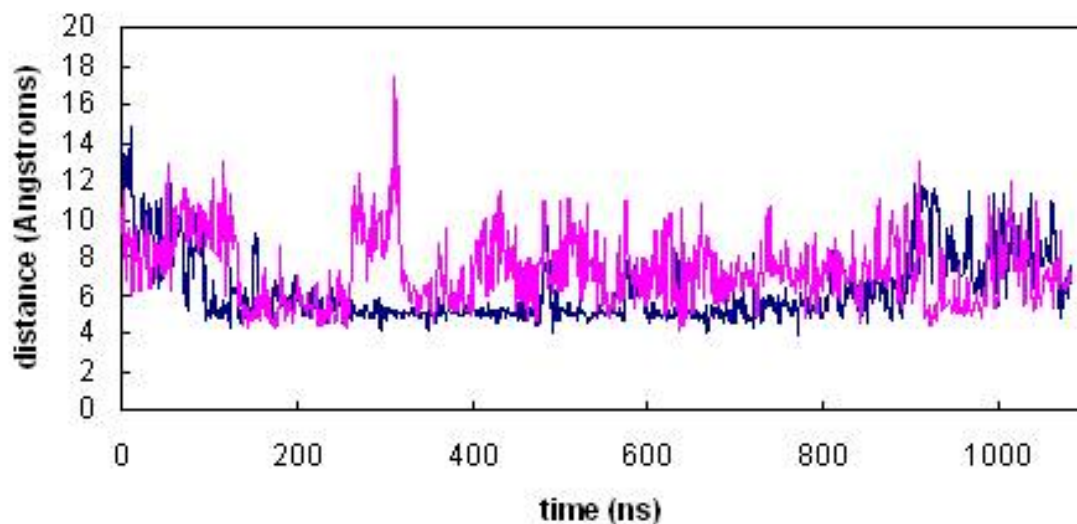

Figure S8. L3 motion in simulations apo1 (blue) and ibm1 (magenta) measured in terms of the distance between the C-alpha atoms of residues N35 and D61.



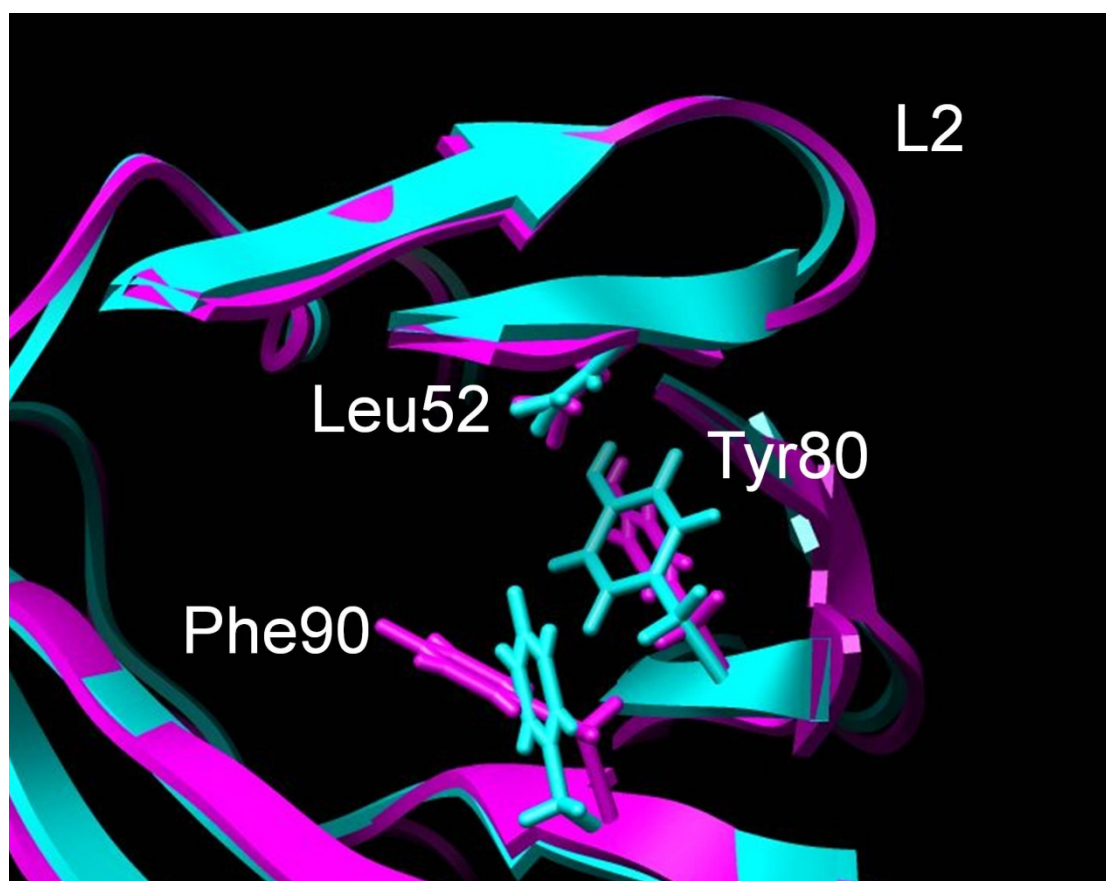

Figure S9. Comparison of the L2 region in the time-averaged structures from the apo- (magenta) and ibm- (cyan) simulations. Ligand binding shifts Phe90, which then packs tighter against Tyr80, which in turn rigidifies residues 48-50 via the interaction with Leu52.

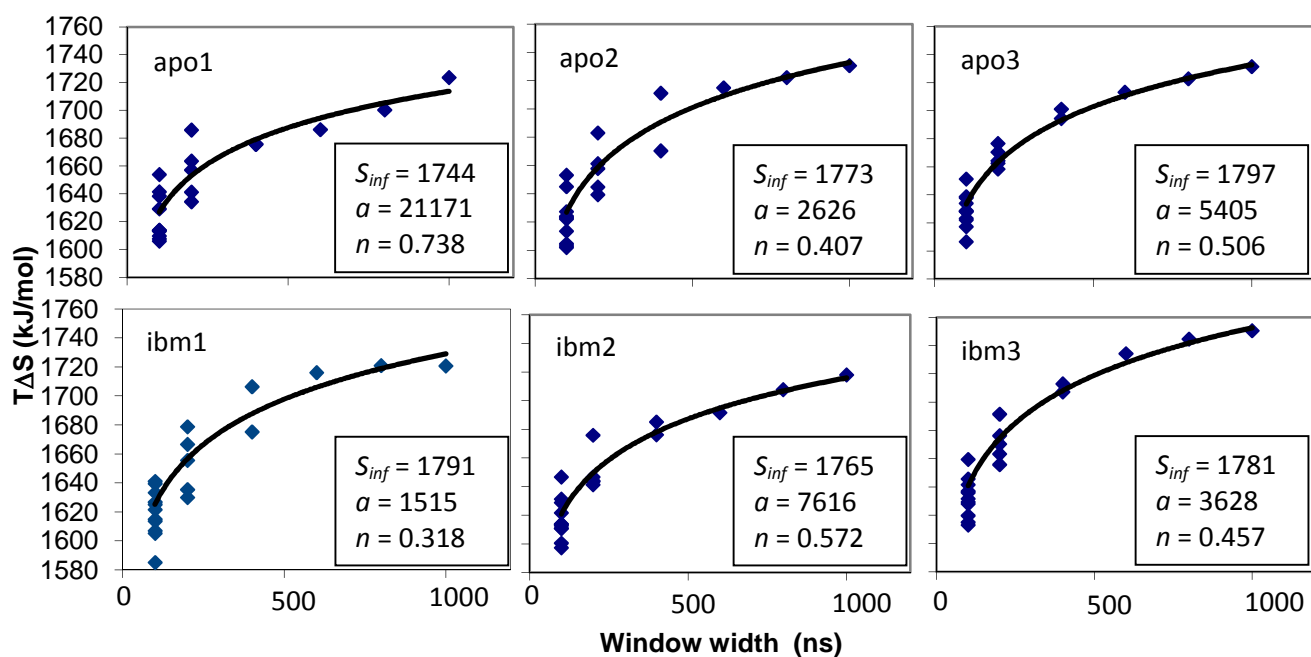

Figure S10. Schlitter entropy convergence. Values of  $S_{inf}$ ,  $a$  and  $n$  from curve fitting are also shown.

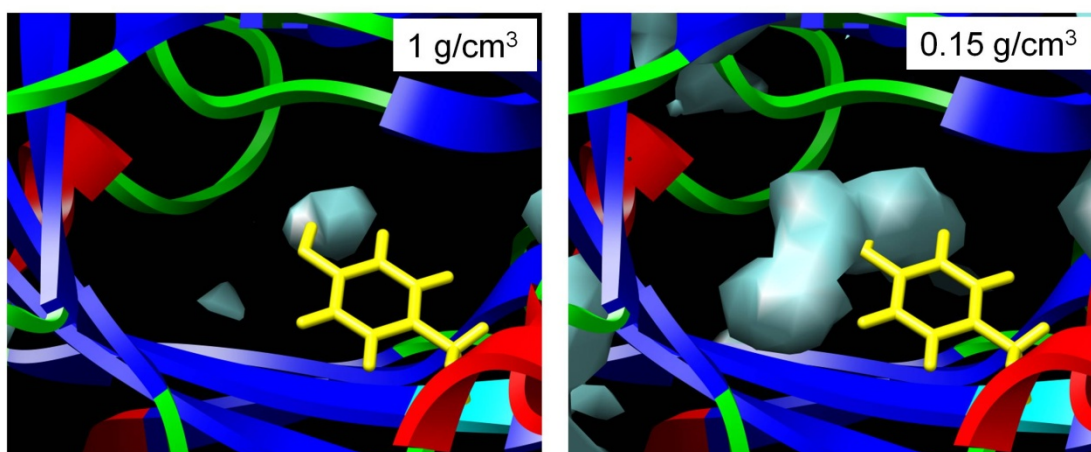

Figure S11. Water density in the ligand binding site of simulation apo1. The left panel shows the small volume with a 'normal' water density around the hydroxyl group of Tyr120, while the right panel is contoured at a low density to reveal the full extent of the binding pocket.

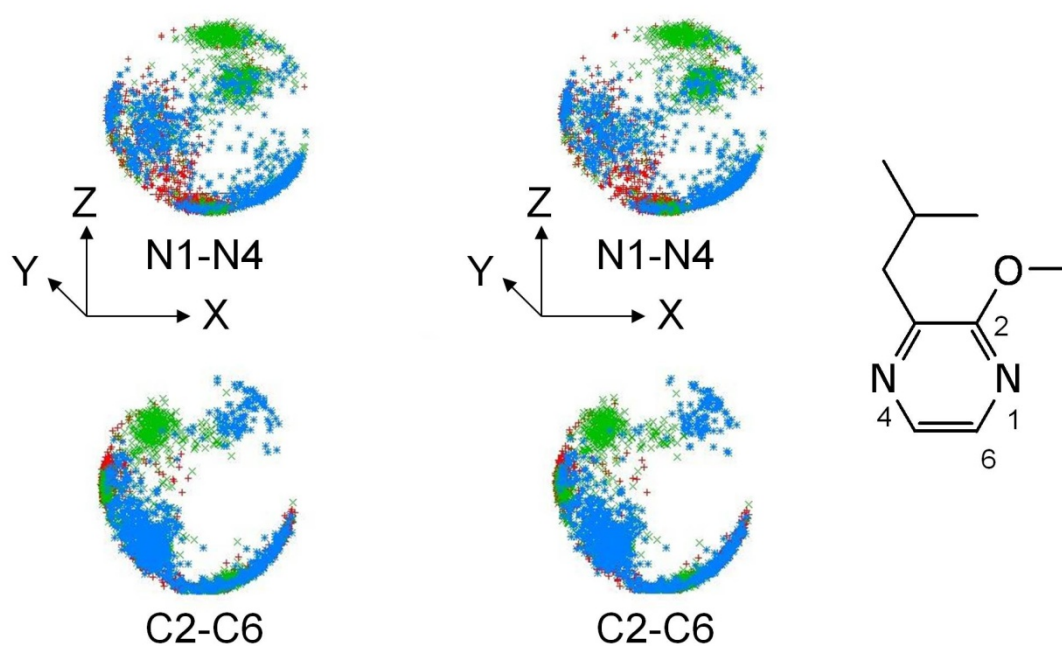

Figure S12. Stereoplots to illustrate ligand tumbling. Top: orientation of the N1-N4 vector, bottom: orientation of the C2-C6 vector. Red: simulation ibm1; green: ibm2; blue: ibm3.



“Prep” input file for the IBM ligand

0 0 2

isobutyl methoxy pyrazine ligand for MUP. RESP charges. From Antechamber  
molecule.res

IBM XYZ 0

```
CORRECT      OMIT DU      BEG
0.0000
 1 DUMM DU      M      0 -1 -2      0.000      .0      .0      .00000
 2 DUMM DU      M      1 0 -1      1.449      .0      .0      .00000
 3 DUMM DU      M      2 1 0      1.522     111.1      .0      .00000
 4 C9      c3      M      3 2 1      1.540     111.208     180.000     -0.447
 5 H91     hc      E      4 3 2      1.088      63.585      39.670      0.107
 6 H92     hc      E      4 3 2      1.086      97.726     145.793      0.107
 7 H93     hc      E      4 3 2      1.086      50.837    -107.553      0.107
 8 C8      c3      M      4 3 2      1.531     150.154     -46.861      0.423
 9 H8      hc      E      8 4 3      1.086     107.891    -107.949     -0.026
10 C10     c3      3      8 4 3      1.531     110.673      10.570     -0.447
11 H101    hc      E     10 8 4      1.087     110.538     -58.025      0.107
12 H102    hc      E     10 8 4      1.084     111.994    -178.171      0.107
13 H103    hc      E     10 8 4      1.087     110.978      61.563      0.107
14 C7      c3      M      8 4 3      1.543     109.736     134.685     -0.432
15 H71     hc      E     14 8 4      1.084     109.527     -67.126      0.124
16 H72     hc      E     14 8 4      1.086     108.771      50.390      0.124
17 C2      ca      M     14 8 4      1.508     114.647     172.289      0.254
18 N1      nb      M     17 14 8      1.302     119.517     102.903     -0.446
19 C6      ca      M     18 17 14      1.338     118.949    -179.861      0.059
20 H6      h4      E     19 18 17      1.073     117.131     179.923      0.099
21 C5      ca      M     19 18 17      1.364     121.003      -0.214     -0.010
22 H5      h4      E     21 19 18      1.074     121.789    -179.914      0.128
23 N4      nb      M     21 19 18      1.338     121.411      -0.164     -0.493
24 C3      ca      M     23 21 19      1.294     117.088      0.325      0.671
25 O11     os      M     24 23 21      1.333     120.518    -179.705     -0.418
26 C12     c3      M     25 24 23      1.411     118.306      0.216     -0.095
27 H121    h1      E     26 25 24      1.081     110.928     -60.780      0.097
28 H122    h1      E     26 25 24      1.080     105.593     179.830      0.097
29 H123    h1      E     26 25 24      1.081     110.848      60.557      0.097
```

LOOP

C2 C3

IMPROPER

```
C7 C3 C2 N1
C5 H6 C6 N1
C6 H5 C5 N4
C2 N4 C3 O11
```

DONE

STOP

(end of file)

## Forcefield parameters for the IBM ligand

IBM parameters

MASS

BOND

ANGLE

|          |        |         |                                    |
|----------|--------|---------|------------------------------------|
| c3-ca-nb | 62.732 | 122.770 | Calculated with empirical approach |
| nb-ca-os | 71.521 | 121.235 | Calculated with empirical approach |
| ca-os-c3 | 62.700 | 118.150 | same as c2-os-c3                   |

DIHE

IMPROPER

|             |     |       |     |                     |
|-------------|-----|-------|-----|---------------------|
| c3-ca-ca-nb | 1.1 | 180.0 | 2.0 | Using default value |
| ca-h4-ca-nb | 1.1 | 180.0 | 2.0 | Using default value |
| ca-nb-ca-os | 1.1 | 180.0 | 2.0 | Using default value |

NONBON

(end of file)
